# Supplementary material
Source: Research Square preprint supplement (doi:10.21203/rs.3.rs-9267448/v1)
Supplement: Supplementary file 1 [file 10926a3bd9f7a243297b3968.docx]

**Table 1**

| **Measure (TP1*)** | **Groups** | **p-valuea, b, c** |
| --- | --- | --- |
| Age (years) | CNC: 31 .8 (STD: 7.0)  ICCU: 31.0 (STD: 6.6) | 0.63**a** |
| DU (n=17): 31.1 (STD: 5.7)  SU (n=15): 30.9 (STD: 7.9) | 0.92**a** |
| Sex (female ¦ male) | CNC: 16 ¦ 22  ICCU: 12 ¦ 20 | 0.22b |
| DU: 8 ¦ 9  SU: 4 ¦ 11 | 0.23b |
| Years between TP1/TP2 MRI | CNC: 1.5 (STD: 1.4)  ICCU: 1.9 (STD: 1.5) | 0.25**a** |
| DU: 2.1 (STD: 1.6)  SU: 1.8 (STD: 1.4) | 0.68**a** |
| Education (years) | CNC: 10.6 (STD: 1.5)  ICCU: 10.3 (STD: 1.5) | 0.44**a** |
| DU: 10.8 (STD: 1.6)  SU: 9.7 (STD: 1.1) | **0.028**a |
| Verbal IQ (MWT-B) | CNC: 109.7 (11.8)  ICCU: 101.1 (10.3) | **0.002**a |
| DU: 103.2 (STD: 11.1)  SU: 98.7 (STD: 9.0) | 0.21a |
| Handedness (Right ¦ Left) | CNC: 36 ¦ 2  ICCU: 32 ¦ 0 | > 0.05b |
| DU: 17 R  SU: 15 R | n. a. |
| ICV (normalized, 0-1) | DU: 0.7 (STD: 0.1)  SU: 0.7 (STD: 0.07) | 0.39a |
| BDI score | CNC: 2.2 (STD: 4.7)  ICCU: 9.2 (STD: 8.9) | **< 0.001**a |
| DU: 9.9 (STD: 8.6)  SU: 8.3 (STD: 9.3) | 0.63a |
| ADHD-SR score | CNC: 6.2 (STD: 5.8)  ICCU: 16.3 (STD: 9.9) | **< 0.001**a |
| DU: 15.9 (STD: 9.6)  SU: 16.8 (STD: 10.6) | 0.81a |
| BIS-11  (self-control) | DU: 15.9 (STD: 3.6)  SU: 13.8 (STD: 2.8) | 0.09a |
| BIS-11  (motor impulsiveness, F2) | DU: 16.9 (STD: 5.6)  SU: 15.6 (STD: 4.1) | 0.49a |
| Alcohol  (pure ethanol; g/week) | CNC: 69.2 (STD: 70.4)  ICCU: 271.0 (STD: 585.5) | **0.039**a |
| DU: 253.7 (STD: 580.1)  SU: 290.8 (STD: 612.9) | 0.87a |
| Alcohol (years of use) | DU: 13.2 (STD: 7.5)  SU: 11.0 (STD: 6.8) | 0.43a |
| Nicotine (duration) | CNC: 8.9 (STD: 7.2)  ICCU: 9.4 (STD: 7.6) | 0.81a |
| DU: 8.0 (STD: 8.3)  SU: 10.9 (STD: 6.6) | 0.29a |
| Amphetamine (g) | DU: 0.2 (STD: 0.5)  SU: 0.03 (STD: 0.05) | 0.15a |
| Cannabis (g) | DU: 2.6 (STD: 6.8)  SU: 1.7 (STD: 3.7 ) | 0.67 a |
| MDMA  hair concentration (pg/mg) | DU: 50.7 (STD: 75.0)  SU: 432.7 (STD: 1008.32) | **0.018**a |
| COC  TP1 hair concentration (pg/mg) | DU: 10676.9 (STD: 14690)  SU: 20886.5 (STD: 31300.9) | 0.41c |
| COC  TP2 hair concentration (pg/mg) | DU: 3563.5 (STD: 5620.2)  SU: 27048.2 (STD: 22459.5) | **< 0.001**c |
| COC  (years of use) | DU: 7.8 (STD: 5.4)  SU: 6.6 (STD: 5.3) | 0.55a |
| COC  (age of onset; years) | DU: 23.3 (STD: 4.3)  SU: 24.2 (STD: 5.0) | 0.59a |
| CCQ | DU: 27.4 (STD: 14.6)  SU: 27.0 (STD: 12.7) | 0.93a |

**Table 1.** Demographics and substance use information. Means and SD of all groups (CNC, Decreasers and Sustained Users) for baseline measurement. Significant P values are shown in bold. ADHD-SR: attention deficit hyperactivity disorder self-rating scale; BDI: Beck Depression Scale; BIS-11: Barratt Impulsiveness Scale; CCQ: Cocaine Craving Questionnaire; COC: cocaine; ICCU: cocaine users; DU: users with longitudinal decrease in cocaine consumption, g: gram; CNC: healthy controls, ICV: intracranial volume; MDMA: 3,4-methylenedioxymethamphetamine (“ecstasy”), mg: milligram, MWT-B: Mehrfachwahl-Wortschatz-Intelligenztest, ng: nanogram. SU: users with longitudinal maintained or increased cocaine consumption, TP1: time point 1, TP2: time point 2; a t-test (independent, two-tailed); b χ2-test for frequency data. c Mann-Whitney U test. * Except for COC TP2.
